# Supplementary material
Source: HighWire-hosted journal article supplement (https://bjsm.bmj.com/content/bjsports-2022-106189)

### Electronic supplementary material

#### **Adherence to aerobic and muscle-strengthening activities guidelines: A systematic review and meta-analysis of 3.3 million participants across 31 countries**

**Online supplemental emethod 1.** Electronic search strategy.

**Online supplemental emethod 2.** Excluded studies and reasons for exclusion.

**Online supplemental eTable 1.** Results of the quality assessment checklist for prevalence studies.

**Online supplemental eFigure 1.** Forest plot of adherence to aerobic and muscle-strengthening activities guidelines by sex.

**Online supplemental eFigure 2.** Forest plot of adherence to aerobic and muscle-strengthening activities guidelines by age.

**Online supplemental eFigure 3.** Forest plot of adherence to aerobic and muscle-strengthening activities guidelines by weight status.

**Online supplemental eFigure 4.** Forest plot of adherence to aerobic and muscle-strengthening activities guidelines by education level.

**Online supplemental eFigure 5.** Forest plot of adherence to aerobic and muscle-strengthening activities guidelines by smoking status.

**Online supplemental eFigure 6.** Forest plot of adherence to aerobic and muscle-strengthening activities guidelines by self-rated health status.

**Online supplemental eFigure 7.** Doi plot for adults  $\geq 18$  years old.

**Online supplemental eFigure 8.** Doi plot for adolescents aged 12-17 years old.

**Online supplemental emethod 1.** Electronic search strategy.*PubMed*

#1 (((("aerobic"[All Fields] AND "aerobic"[All Fields]) OR OR "exercise"[MeSH Terms] OR "exercise"[All Fields] AND ("exercise"[MeSH Terms] OR "exercise"[All Fields] OR ("physical"[All Fields] AND "activity"[All Fields]) OR "physical activity"[All Fields]) AND ("muscle-strengthening"[All Fields] AND ("activable"[All Fields] OR "activate"[All Fields] OR "activated"[All Fields] OR "activates"[All Fields] OR "activating"[All Fields] OR "activation"[All Fields] OR "activations"[All Fields] OR "activator"[All Fields] OR "activator s"[All Fields] OR "activators"[All Fields] OR "active"[All Fields] OR "acted"[All Fields] OR "actively"[All Fields] OR "actives"[All Fields] OR "activities"[All Fields] OR "activity s"[All Fields] OR "activitys"[All Fields] OR "motor activity"[MeSH Terms] OR ("motor"[All Fields] AND "activity"[All Fields]) OR "motor activity"[All Fields] OR "activity"[All Fields])) AND ("strengthen"[All Fields] OR "strengthened"[All Fields] OR "strengthening"[All Fields] OR "strengthens"[All Fields])) OR ("muscle-strengthening"[All Fields] AND ("exercise"[MeSH Terms] OR "exercise"[All Fields] OR "exercises"[All Fields] OR "exercise therapy"[MeSH Terms] OR ("exercise"[All Fields] AND "therapy"[All Fields]) OR "exercise therapy"[All Fields] OR "exercise s"[All Fields] OR "exercised"[All Fields] OR "exerciser"[All Fields] OR "exercisers"[All Fields] OR "exercising"[All Fields])))

#2 ("adherence"[All Fields] OR "adhere"[All Fields] OR "adhered"[All Fields] OR "adherence"[All Fields] OR "adherences"[All Fields] OR "adherent"[All Fields] OR "adherents"[All Fields] OR "adherer"[All Fields] OR "adherers"[All Fields] OR "adheres"[All Fields] OR "adhering"[All Fields]) AND ("guideline"[Publication Type] OR "guidelines as topic"[MeSH Terms] OR "guidelines"[All Fields] OR "recommendation as topic"[MeSH Terms] OR "recommendation"[All Fields])

#3 #1 AND #2

*Web of Science*

#1 TOPIC: ("aerobic physical activity" OR "exercise")

#2 TOPIC: ("muscle-strengthening" OR "strengthening" OR "strengthen" OR "strengthened" OR "strengthens")

#3 TOPIC: ("adherence" OR "adhering")

#4 TOPIC: ("guideline" OR "guidelines" OR "recommendation")

#5 #4 AND #3 AND #2 AND #1

*SPORTDiscus*

S1 (MH "aerobic physical activity") OR (MH "exercise")

S2 (MH "muscle-strengthening") OR 'strengthening' OR 'strengthen' OR 'strengthened' OR 'strengthens'

S3 ((MH "adherence") OR 'adhering')

S4 (MH "guideline") OR 'guideline' OR 'recommendation'

S5 S4 AND S3

#### *EMBASE*

((('adherence'/exp OR adherence OR adhering:ti,ab,kw) AND 'physical activity':ti,ab,kw OR exercise:ti,ab,kw) AND ('resistance training':ti,ab,kw OR 'strengthening exercise':ti,ab,kw) AND (guideline:ti,ab,kw OR recommendation:ti,ab,kw OR guidelines))

#### *Scopus*

( TITLE-ABS-KEY ( adherence OR adhering ) AND TITLE-ABS-KEY ( "aerobic physical activity" OR exercise OR "physical activity" ) AND TITLE-ABS-KEY ( strength OR strengthening OR muscle-strengthening OR strengthen OR strengthening ) AND TITLE-ABS-KEY ( guidelines OR guideline OR recommendations ) )

**Online supplemental emethod 2.** Excluded studies and reasons for exclusion.

Ahn, H., Choi, H. Y., & Ki, M. (2010). The association between levels of physical activity and low handgrip strength: Korea National. *People*, 39(4), 412-23.

Reason for exclusion: Duplicated

Bennie, J. A., De Cocker, K., Teychenne, M. J., Brown, W. J., & Biddle, S. J. (2019). The epidemiology of aerobic physical activity and muscle-strengthening activity guideline adherence among 383,928 US adults. *International Journal of Behavioral Nutrition and Physical Activity*, 16(1), 1-11.

Reason for exclusion: Duplicated

Bennie, J. A., Teychenne, M. J., De Cocker, K., & Biddle, S. J. (2019). Associations between aerobic and muscle-strengthening exercise with depressive symptom severity among 17,839 US adults. *Preventive medicine*, 121, 121-127.

Reason for exclusion: Duplicated

Bennie, J. A., De Cocker, K., Biddle, S. J., & Teychenne, M. J. (2020). Joint and dose-dependent associations between aerobic and muscle-strengthening activity with depression: A cross-sectional study of 1.48 million adults between 2011 and 2017. *Depression and anxiety*, 37(2), 166-178.

Reason for exclusion: Duplicated

Bennie, J. A., De Cocker, K., & Duncan, M. J. (2021). Associations of muscle-strengthening and aerobic exercise with self-reported components of sleep health among a nationally representative sample of 47,564 US adults. *Sleep Health*, 7(2), 281-288.

Reason for exclusion: Duplicated

Bennie, J. A., Ding, D., & De Cocker, K. Dose-dependent associations of joint aerobic and muscle-strengthening exercise with obesity: A cross-sectional study of 280,605 adults. *Journal of sport and health science*, S2095-2546.

Reason for exclusion: Duplicated

Blackwell, D. L., & Clarke, T. C. (2016). Occupational Differences Among Employed Adults Who Met 2008 Federal Guidelines for Both Aerobic and Muscle-strengthening Activities: United States, 2008-2014. *National health statistics reports*, (94), 1-12.

Reason for exclusion: Duplicated

Blackwell, D. L., & Clarke, T. C. (2018). State variation in meeting the 2008 federal guidelines for both aerobic and muscle-strengthening activities through leisure-time physical activity among adults aged 18-64: United States, 2010-2015. *National health statistics reports*, (112), 1-22.

Reason for exclusion: Duplicated

Branscum, P., & Fairchild, G. (2019). Differences in determinants of aerobic and muscle strengthening physical activity among college students: a reasoned action approach. *Journal of Sports Sciences*, 37(1), 90-99.

Reason for exclusion: Non-representative sample

Buckner, S. L., Loenneke, J. P., & Loprinzi, P. D. (2017). Single and combined associations of accelerometer-assessed physical activity and muscle-strengthening activities on plasma homocysteine in a national sample. *Clinical physiology and functional imaging*, 37(6), 669-674.

Reason for exclusion: Duplicated

Carlson, S. A., Fulton, J. E., Schoenborn, C. A., & Loustalot, F. (2010). Trend and prevalence estimates based on the 2008 Physical Activity Guidelines for Americans. *American journal of preventive medicine*, 39(4), 305-313.

Reason for exclusion: Duplicated

Centers for Disease Control and Prevention (CDC). (2013). Suicide among adults aged 35-64 years--United States, 1999-2010. *MMWR. Morbidity and mortality weekly report*, 62(17), 321-325.

Reason for exclusion: Duplicated

Harris, C. D., Watson, K. B., Carlson, S. A., Fulton, J. E., Dorn, J. M., & Elam-Evans, L. (2013). Adult participation in aerobic and muscle-strengthening physical activities—United States, 2011. *Morbidity and Mortality Weekly Report*, 62(17), 326-330.

Reason for exclusion: Duplicated

Chen, S., Malette, L., & Ling, J. An examination of physical activity guidelines and health-related quality of life among US older adults. *Preventive medicine*, 156, 106986.

Reason for exclusion: Duplicated

Dankel, S. J., Loenneke, J. P., & Loprinzi, P. D. (2016). The individual, joint, and additive interaction associations of aerobic-based physical activity and muscle strengthening activities on metabolic syndrome. *International journal of behavioral medicine*, 23(6), 707-713.

Reason for exclusion: Duplicated

Desmond, R., Jackson, B. E., & Hunter, G. (2015). Utilization of 2013 BRFSS Physical Activity Data for State Cancer Control Plan Objectives: Alabama Data. *Southern Medical Journal*, 108(5), 290-297.

Reason for exclusion: Duplicated

Du, Y., Liu, B., Sun, Y., Snetselaar, L. G., Wallace, R. B., & Bao, W. (2019). Trends in adherence to the physical activity guidelines for Americans for aerobic activity and time spent on sedentary behavior among US adults, 2007 to 2016. *JAMA network open*, 2(7), e197597.

Reason for exclusion: Study design

Lange, C., & Manz, K. (2017). Health-enhancing physical activity during leisure time among adults in Germany. *Journal of Health Monitoring*, 2(2).

Reason for exclusion: Duplicated

Grøntved, A., Pan, A., Mekary, R. A., Stampfer, M., Willett, W. C., Manson, J. E., & Hu, F. B. (2014). Muscle-strengthening and conditioning activities and risk of type 2 diabetes: a prospective study in two cohorts of US women. *PLoS medicine*, 11(1), e1001587.

Reason for exclusion: Non-representative sample

Hyde, E. T., Whitfield, G. P., Omura, J. D., Fulton, J. E., & Carlson, S. A. (2021). Trends in meeting the Physical Activity Guidelines: muscle-strengthening alone and combined with aerobic activity, United States, 1998–2018. *Journal of Physical Activity and Health*, 18(S1), S37-S44.

Reason for exclusion: Duplicated

Hyde, E. T., Watson, K. B., Omura, J. D., Janz, K. F., Lee, S. M., Fulton, J. E., & Carlson, S. A. (2021). Surveillance of Meeting the Youth Physical Activity Guideline: Impact of Including Vigorous-Intensity and Bone-Strengthening Activities. *Research Quarterly for Exercise and Sport*, 1-6.

Reason for exclusion: Duplicated

Kim, J. (2017). Longitudinal trend of prevalence of meeting physical activity guidelines among Korean adults. *Exercise Medicine*, 1.

Reason for exclusion: Study design

Lim, J., Park, S., & Kim, J. S. (2021). Joint association of aerobic physical activity and muscle-strengthening activities with metabolic syndrome: the Korean National Health and Nutrition Examination Survey 2014-2015. *Epidemiology and health*, 43, e2021096.

Reason for exclusion: Duplicated

Mama, S. K., Bhuiyan, N., Foo, W., Segel, J. E., Bluethmann, S. M., Winkels, R. M., ... & Schmitz, K. H. (2020). Rural-urban differences in meeting physical activity recommendations and health status in cancer survivors in central Pennsylvania. *Supportive Care in Cancer*, 28(10), 5013-5022.

Reason for exclusion: Clinical population

Mekary, R. A., Grøntved, A., Despres, J. P., De Moura, L. P., Asgarzadeh, M., Willett, W. C., ... & Hu, F. B. (2015). Weight training, aerobic physical activities, and long-term waist circumference change in men. *Obesity*, 23(2), 461-467.

Reason for exclusion: Non-representative sample

Merlo, C. L., Jones, S. E., Michael, S. L., Chen, T. J., Sliwa, S. A., Lee, S. H., ... & Park, S. (2020). Dietary and Physical Activity Behaviors Among High School Students—Youth Risk Behavior Survey, United States, 2019. *MMWR supplements*, 69(1), 64-76.

Reason for exclusion: Duplicated

Mu, L., Cohen, A. J., & Mukamal, K. J. (2015). Prevalence and predictors of resistance and aerobic exercise among hypertensive adults in the United States. *Journal of human hypertension*, 29(6), 394-395.

Reason for exclusion: Duplicated

Murphy, L. B., Hootman, J. M., Boring, M. A., Carlson, S. A., Qin, J., Barbour, K. E., ... & Helmick, C. G. (2017). Leisure Time Physical Activity Among US Adults With Arthritis, 2008– 2015. *American Journal of Preventive Medicine*, 53(3), 345-354.

Reason for exclusion: Clinical population

Nie, J., Haberstroh, M., Acosta, T., Huang, W., Wang, Y., & Barengo, N. C. (2021). Independent and joint associations between leisure time physical activity and strength activities with mortality outcomes in older adults at least 65 years of age: a prospective cohort study. *The Journals of Gerontology: Series A*, 76(12), 2122-2131.

Reason for exclusion: Study design

Oftedal, S., Smith, J., Vandelanotte, C., Burton, N. W., & Duncan, M. J. (2019). Resistance training in addition to aerobic activity is associated with lower likelihood of depression and comorbid depression and anxiety symptoms: a cross sectional analysis of Australian women. *Preventive Medicine*, 126, 105773.

Reason for exclusion: Non-representative sample

Oftedal, S., Holliday, E. G., Reynolds, A. C., Bennie, J. A., Kline, C. E., & Duncan, M. J. (2022). Prevalence, Trends, and Correlates of Joint Patterns of Aerobic and Muscle-Strengthening Activity and Sleep Duration: A Pooled Analysis of 359,019 Adults in the National Health Interview Survey 2004–2018. *Journal of Physical Activity and Health*, 19(4), 246-255.

Reason for exclusion: Duplicated

Quinn, T. D., Wu, F., Mody, D., Bushover, B., Mendez, D. D., Schiff, M., & Fabio, A. (2019). Associations Between Neighborhood Social Cohesion and Physical Activity in the United States, National Health Interview Survey, 2017. *Preventing Chronic Disease*, 16, E163.

Reason for exclusion: Duplicated

Schoenborn, C. A., & Stommel, M. (2011). Adherence to the 2008 adult physical activity guidelines and mortality risk. *American journal of preventive medicine*, 40(5), 514-521.

Reason for exclusion: Duplicated

Siahpush, M., Levan, T. D., Nguyen, M. N., Grimm, B. L., Ramos, A. K., Michaud, T. L., & Johansson, P. L. (2019). The association of physical activity and mortality risk reduction among smokers: Results from 1998–2009 national health Interview surveys–national death index linkage. *Journal of Physical Activity and Health*, 16(10), 865-871.

Reason for exclusion: Duplicated

Song, M., Nam, S., Buss, J., & Lee, S. J. (2020). Assessing the prevalence of meeting physical activity recommendations among US healthcare workers: Data from the 2015 National Health Interview Survey. *Archives of Environmental & Occupational Health*, 75(7), 422-430.

Reason for exclusion: Duplicated

Strain, T., Fitzsimons, C., Kelly, P., & Mutrie, N. (2016). The forgotten guidelines: cross-sectional analysis of participation in muscle strengthening and balance & coordination activities by adults and older adults in Scotland. *BMC public health*, 16(1), 1-12.

Reason for exclusion: Study design

Sudeck, G., Geidl, W., Abu-Omar, K., Finger, J. D., Krauß, I., & Pfeifer, K. (2021). Do adults with non-communicable diseases meet the German physical activity recommendations?. *German Journal of Exercise and Sport Research*, 51(2), 183-193.

Reason for exclusion: Duplicated

Sung, J. H., Son, S. R., Baek, S. H., & Kim, B. J. (2021). Association of occupation with the daily physical activity and sedentary behaviour of middle-aged workers in Korea: a cross-sectional study based on data from the Korea National Health and Nutrition Examination Survey. *BMJ open*, 11(11), e055729.

Reason for exclusion: Study design

Tarasenko, Y., Chen, C., & Schoenberg, N. (2017). Self-reported physical activity levels of older cancer survivors: Results from the 2014 National Health Interview Survey. *Journal of the American Geriatrics Society*, 65(2), e39-e44.



Reason for exclusion: Duplicated

Tarasenko, Y. N., Linder, D. F., & Miller, E. A. (2018). Muscle-strengthening and aerobic activities and mortality among 3+ year cancer survivors in the US. *Cancer Causes & Control*, 29(4), 475-484.

Reason for exclusion: Duplicated

Tittlbach, S. A., Hoffmann, S. W., & Bennie, J. A. (2022). Association of meeting both muscle strengthening and aerobic exercise guidelines with prevalent overweight and obesity classes—results from a nationally representative sample of German adults. *European Journal of Sport Science*, 22(3), 436-446.

Reason for exclusion: Duplicated

Visaria, A., Nagaraj, B., Shah, M., Kethidi, N., Modak, A., Shahani, J., ... & Raghuvanshi, M. (2022). Low Amount and Intensity of Leisure-time Physical Activity in Asian Indian Adults. *American Journal of Health Promotion*, 36(3), 440-449.

Reason for exclusion: Duplicated

Walker, T. J., Tullar, J. M., Diamond, P. M., Kohl, H. W., & Amick, B. C. (2017). The relation of combined aerobic and muscle-strengthening physical activities with presenteeism. *Journal of Physical Activity and Health*, 14(11), 893-898.

Reason for exclusion: Non-representative sample

Watson, K. B., Whitfield, G., Chen, T. J., Hyde, E. T., & Omura, J. D. (2021). Trends in Aerobic and Muscle-Strengthening Physical Activity by Race/Ethnicity Across Income Levels Among US Adults, 1998–2018. *Journal of Physical Activity and Health*, 18(S1), S45-S52.

Reason for exclusion: Duplicated

Xin, F., Zhu, Z., Chen, S., Chen, H., Hu, X., Ma, X., ... & Tang, Y. (2022). Prevalence and correlates of meeting the muscle-strengthening exercise recommendations among Chinese children and adolescents: Results from 2019 Physical Activity and Fitness in China—The Youth Study. *Journal of Sport and Health Science*, 11(3), 358-366.

Reason for exclusion: Study design

Zhao, G., Li, C., Ford, E. S., Fulton, J. E., Carlson, S. A., Okoro, C. A., ... & Balluz, L. S. (2014). Leisure-time aerobic physical activity, muscle-strengthening activity and mortality risks among US adults: the NHANES linked mortality study. *British journal of sports medicine*, 48(3), 244-249.

Reason for exclusion: Duplicated

**Online supplemental eTable 1.** Characteristics of studies included in the meta-analysis.

| Author, year              | Country   | Study design    | Source of information                                         | Study period | N (% females) / Age           | Physical activity assessment and physical active definition                                                                                                                                                                                                                 | Overall prevalence |
|---------------------------|-----------|-----------------|---------------------------------------------------------------|--------------|-------------------------------|-----------------------------------------------------------------------------------------------------------------------------------------------------------------------------------------------------------------------------------------------------------------------------|--------------------|
| Bennie et al. 2016 [21]   | Australia | Cross-sectional | National Nutrition and Physical Activity Survey (NNPAS)       | 2011-2012    | 9,284 (54.1) / 18-85 years    | Active Australia Survey<br>≥150 MVPA min per week and ≥2 sessions per week of strength or toning activities                                                                                                                                                                 | 15%                |
| Bennie et al. 2017 [22]   | Finland   | Cross-sectional | Regional Health and Well-being Study                          | 2013-2014    | 69,032 (52.0) / ≥ 18 years    | Self-reported<br><br>Finnish recommendations: ≥150 moderate-intensity min per week or ≥75 vigorous-intensity min per week or an equivalent combination of both and reporting MVPA on ≥3 days per week and ≥2 times per week of MSA and/or balance training                  | 10.8%              |
| Bennie et al. 2020 A [23] | USA       | Cross-sectional | US Behavioral Risk Factor Surveillance System (BRFSS) surveys | 2011-2017    | 1,677,108 (51.6) / ≥ 18 years | Behavioural Risk Factor Surveillance System<br><br>Meeting both 150 min per week of moderate-intensity aerobic physical activity, or 75 min per week of vigorous-intensity aerobic physical activity, or an equivalent combination of both and ≥ 2 sessions per week of MSA | 20.2%              |

|                              |                       |                 |                                                                    |           |                                  |                                                                                                                                                                                                 |       |
|------------------------------|-----------------------|-----------------|--------------------------------------------------------------------|-----------|----------------------------------|-------------------------------------------------------------------------------------------------------------------------------------------------------------------------------------------------|-------|
| Bennie et al. 2020 B [24]    | South Korea           | Cross-sectional | Korea National Health and Nutritional Examination Survey (KNHANES) | 2014-2015 | 9,120 (50.3) / 20-80 years       | GPAQ Meeting both MVPA $\geq 150$ minutes per week and muscle strengthening exercise $\geq 2$ sessions per week                                                                                 | 15.4% |
| Bennie et al. 2021 [25]      | Germany               | Cross-sectional | German Health Update survey                                        | 2014      | 24,016 (51.1) / $\geq 18$ years  | Interview Survey Physical Activity Questionnaire Meeting both MVPA $\geq 150$ minutes per week and muscle strengthening exercise $\geq 2$ sessions per week                                     | 22.6% |
| Bennie and Wiesner 2022 [26] | 28 European countries | Cross-sectional | European Health Interview Survey                                   | 2013-2014 | 280,605 (52.1) / $\geq 18$ years | European Health Interview Survey – Physical Activity Questionnaire (EHIS-PAQ) Aerobic physical activity $\geq 150$ min/ per week and muscle strengthening exercise $\geq 2$ sessions per week   | 15.0% |
| CDC 2011 [39]                | USA                   | Cross-sectional | National Youth Physical Activity and Nutrition Study (NYPANS)      | 2010      | 9,701 (NR) / 14–18 years         | NYPANS questions Aerobic physical activity and muscle-strengthening activity participation in $\geq 60$ minutes of aerobic activity per day, 7 days per week and MSA on $\geq 3$ days per week) | 15.3% |
| Chen et al. 2021 [9]         | USA                   | Cross-sectional | Youth Risk Behavior Survey (YRBS)                                  | 2011-2019 | 86,869 (49.3) / 14-18 years      | YRBS questions Aerobic physical activity and muscle-strengthening activity                                                                                                                      | 19.2% |

|                            |         |                 |                                                               |               |                                  |                                                                                                                                                                                                        |       |
|----------------------------|---------|-----------------|---------------------------------------------------------------|---------------|----------------------------------|--------------------------------------------------------------------------------------------------------------------------------------------------------------------------------------------------------|-------|
|                            |         |                 |                                                               |               |                                  | participation of $\geq 60$ min of aerobic activity per day, 7 days per week and MSA on $\geq 3$ days per week                                                                                          |       |
| Churilla et al. 2022 [27]  | USA     | Cross-sectional | US Behavioral Risk Factor Surveillance System (BRFSS) surveys | 2019          | 323,435 (49.6) / $\geq 18$ years | Behavioural Risk Factor Surveillance System<br><br>Aerobic physical activity $\geq 150$ min per week and muscle strengthening exercise $\geq 2$ sessions per week                                      | 23.5% |
| de Cocker et al. 2020 [28] | UK      | Cross-sectional | Health Survey for England (HSE) study                         | 2012-2016     | 14,050 (56.0%) / $\geq 16$ years | Self-reported questionnaire<br><br>$\geq 150$ min of moderate activity or 75 min of vigorous activity per week or an equivalent combination of both; and undertaking MSA on at least two days per week | 25.7% |
| Dankel et al. 2016 [29]    | USA     | Cross-sectional | National Health and Nutrition Examination Survey (NHANES)     | 2003-2006     | 4,587 (49.0) / $\geq 20$ years   | Accelerometry (ActiGraph 7164) and questionnaire<br><br>Accelerometer-determined physical activity $\geq 150$ min per week of MVPA and $\geq 8$ days of MSA within the past 30 days                    | 11.0% |
| Dorner et al. 2021 [30]    | Austria | Cross-sectional | Austrian Health Interview Surveys                             | 2014 and 2019 | 31,232 (51.2%) / $\geq 15$ years | European Health Interview Survey – Physical Activity Questionnaire (EHIS-PAQ)<br><br>Aerobic physical activity $\geq 150$ min per week and muscle                                                      | 23.8% |

|                                 |                 |                 |                                                                 |           |                                                                                       |                                                                                                                                                                                                                                                                                                                                                                                                   |                                                             |
|---------------------------------|-----------------|-----------------|-----------------------------------------------------------------|-----------|---------------------------------------------------------------------------------------|---------------------------------------------------------------------------------------------------------------------------------------------------------------------------------------------------------------------------------------------------------------------------------------------------------------------------------------------------------------------------------------------------|-------------------------------------------------------------|
|                                 |                 |                 |                                                                 |           |                                                                                       | strengthening exercise $\geq 2$ sessions per week                                                                                                                                                                                                                                                                                                                                                 |                                                             |
| Duijvestijn et al. 2020 [31]    | The Netherlands | Cross-sectional | Dutch Health Survey/Lifestyle Monitor by Statistics Netherlands | 2018      | 226,083 (52.0%) / $\geq 12$ years                                                     | Short Questionnaire to Assess Health-enhancing physical activity (SQUASH)<br><br>Adolescents: Aerobic physical activity and muscle-strengthening activity participation in $\geq 60$ min of aerobic activity per day, 7 days per week and MSA on $\geq 3$ days per week<br>Adults: Aerobic physical activity $\geq 150$ min per week and muscle strengthening exercise $\geq 2$ sessions per week | 33.9% (12-17 years old)<br><br>43.5% ( $\geq 18$ years old) |
| Lackinger and Dorner, 2015 [32] | Austria         | Cross-sectional | Austrian Health Interview Survey                                | 2006-2007 | 467 (46.7) / 20-29 years                                                              | IPAQ<br><br>Aerobic physical activity $\geq 150$ min per week and muscle strengthening exercise $\geq 2$ sessions per week                                                                                                                                                                                                                                                                        | 39.4%                                                       |
| Lee et al. 2022 [33]            | South Korea     | Cross-sectional | National Health Insurance Service of South Korea                | 2018-2019 | Cohort A: 76,395 (51.2) / $\geq 20$ years<br>Cohort B: 2,295 (53.5) / $\geq 20$ years | Self-reported questionnaire<br><br>$\geq 150$ min of moderate activity or 75 min of vigorous activity per week or an equivalent combination of both; and undertaking MSA on at least two days per week                                                                                                                                                                                            | Cohort A: 14.5%<br>Cohort B: 12.7%                          |
| Sandercock et al. 2022 [34]     | UK              | Cross-sectional | Active Lives Survey                                             | 2015-2017 | 275,182 (48.9) /                                                                      | Active Lives dataset                                                                                                                                                                                                                                                                                                                                                                              | 26.5%                                                       |

|                                  |             |                 |                                                                    |           |                                 |                                                                                                                                                                                                                                       |       |
|----------------------------------|-------------|-----------------|--------------------------------------------------------------------|-----------|---------------------------------|---------------------------------------------------------------------------------------------------------------------------------------------------------------------------------------------------------------------------------------|-------|
|                                  |             |                 |                                                                    |           | 18-95 years                     | 150 min per week equivalent moderate physical activity including two sessions of strengthening activities                                                                                                                             |       |
| Song et al. 2013 [35]            | USA         | Cross-sectional | National Health and Nutrition Examination Survey (NHANES)          | 1999-2006 | 6547 (48.9) / 12-17 years       | Self-reported questionnaire<br><br>Aerobic physical activity and MSA participation in $\geq 60$ min of aerobic activity per day, 7 days per week and MSA on $\geq 3$ days per week                                                    | 16.3% |
| Sung et al. 2022 [36]            | South Korea | Cross-sectional | Korea National Health and Nutritional Examination Survey (KNHANES) | 2016-2019 | 23,505 (50.5) / $\geq 20$ years | GPAQ<br><br>Aerobic physical activity $\geq 150$ min per week and muscle strengthening exercise $\geq 2$ sessions per week                                                                                                            | 14.5% |
| Wennman and Borodulin, 2020 [37] | Finland     | Cross-sectional | FinHealth 2017 Study                                               | 2017      | 5335 (56.0) / $\geq 18$ years   | FinHealth Health-Enhancing Physical Activity Questionnaire<br><br>$\geq 150$ min of moderate activity or 75 min of vigorous activity per week or an equivalent combination of both; and undertaking MSA on at least two days per week | 34.2% |
| Whitfield et al. 2019 [38]       | USA         | Cross-sectional | National Health Interview Survey                                   | 2017      | 23,006 (51.8) / $\geq 18$ years | Sample Adult Core questions<br><br>150–300 min of moderate-intensity, or 75–150 min of vigorous-intensity aerobic physical activity per week, or an equivalent combination of                                                         | 24.3% |

|                                                                                                                                                                                                                         |     |             |                                  |           |                                  |                                                                                                                                                                                                        |       |
|-------------------------------------------------------------------------------------------------------------------------------------------------------------------------------------------------------------------------|-----|-------------|----------------------------------|-----------|----------------------------------|--------------------------------------------------------------------------------------------------------------------------------------------------------------------------------------------------------|-------|
|                                                                                                                                                                                                                         |     |             |                                  |           |                                  | moderate- and vigorous-intensity aerobic physical activity and MSA of at least moderate intensity that involve all major muscle groups on $\geq 2$ days per week                                       |       |
| Zhao et al. 2020 [8]                                                                                                                                                                                                    | USA | Prospective | National Health Interview Survey | 1997-2014 | 479,856 (48.2) / $\geq 18$ years | Sample Adult Core questions<br><br>$\geq 150$ min of moderate activity or 75 min of vigorous activity per week or an equivalent combination of both; and undertaking MSA on at least two days per week | 15.9% |
| Abbreviations: GPAQ, Global Physical Activity Questionnaire; IPAQ, international physical activity questionnaire; MSA, Muscle-strengthening activities; MVPA, moderate-to-vigorous physical activity; NR, not reported. |     |             |                                  |           |                                  |                                                                                                                                                                                                        |       |

**Online supplemental eTable 2.** Results of the quality assessment checklist for prevalence studies.

| Study                     | 1 | 2 | 3 | 4 | 5 | 6 | 7 | 8 | 9 | Total score | Summary on the overall risk of study bias |
|---------------------------|---|---|---|---|---|---|---|---|---|-------------|-------------------------------------------|
| Bennie et al. 2016        | 0 | 0 | 0 | 0 | 0 | 0 | 0 | 0 | 0 | 0           | Low risk                                  |
| Bennie et al. 2017        | 0 | 0 | 0 | 1 | 0 | 0 | 1 | 0 | 0 | 2           | Low risk                                  |
| Bennie et al. 2020 A      | 0 | 0 | 0 | 1 | 0 | 0 | 0 | 0 | 0 | 1           | Low risk                                  |
| Bennie et al. 2020 B      | 0 | 0 | 0 | 0 | 0 | 0 | 1 | 0 | 0 | 1           | Low risk                                  |
| Bennie et al. 2021        | 0 | 0 | 0 | 0 | 0 | 0 | 1 | 0 | 0 | 1           | Low risk                                  |
| Bennie & Wiesner 2022     | 0 | 0 | 0 | 0 | 0 | 0 | 1 | 0 | 0 | 1           | Low risk                                  |
| CDC 2011                  | 0 | 0 | 0 | 0 | 0 | 0 | 1 | 0 | 0 | 1           | Low risk                                  |
| Chen et al. 2021          | 0 | 0 | 0 | 0 | 0 | 0 | 0 | 0 | 0 | 0           | Low risk                                  |
| Churilla et al. 2022      | 0 | 0 | 0 | 0 | 0 | 0 | 0 | 0 | 0 | 0           | Low risk                                  |
| De Cocker et al. 2020     | 0 | 0 | 0 | 1 | 0 | 0 | 1 | 0 | 0 | 2           | Low risk                                  |
| Dankel et al. 2016        | 0 | 0 | 0 | 0 | 0 | 0 | 0 | 0 | 0 | 0           | Low risk                                  |
| Dorner et al. 2021        | 0 | 0 | 0 | 0 | 0 | 0 | 1 | 0 | 0 | 1           | Low risk                                  |
| Duijvestijn et al. 2020   | 0 | 0 | 0 | 0 | 0 | 0 | 0 | 0 | 0 | 0           | Low risk                                  |
| Lackinger & Dorner, 2015  | 0 | 0 | 0 | 0 | 0 | 0 | 0 | 0 | 0 | 0           | Low risk                                  |
| Lee et al. 2022           | 0 | 0 | 0 | 1 | 0 | 0 | 0 | 0 | 0 | 0           | Low risk                                  |
| Sandercock et al. 2022    | 0 | 0 | 0 | 0 | 0 | 0 | 1 | 0 | 0 | 1           | Low risk                                  |
| Song et al. 2013          | 0 | 0 | 0 | 1 | 0 | 0 | 0 | 0 | 0 | 1           | Low risk                                  |
| Sung et al. 2022          | 0 | 0 | 0 | 0 | 0 | 0 | 0 | 0 | 0 | 0           | Low risk                                  |
| Wennman & Borodulin, 2020 | 0 | 0 | 0 | 0 | 0 | 0 | 1 | 0 | 0 | 1           | Low risk                                  |
| Whitfield et al. 2019     | 0 | 0 | 0 | 0 | 0 | 0 | 1 | 0 | 0 | 1           | Low risk                                  |
| Zhao et al. 2020          | 0 | 0 | 0 | 0 | 0 | 0 | 0 | 0 | 0 | 0           | Low risk                                  |



**Online supplemental eFigure 1.** Forest plot of adherence to aerobic and muscle-strengthening activities guidelines by sex.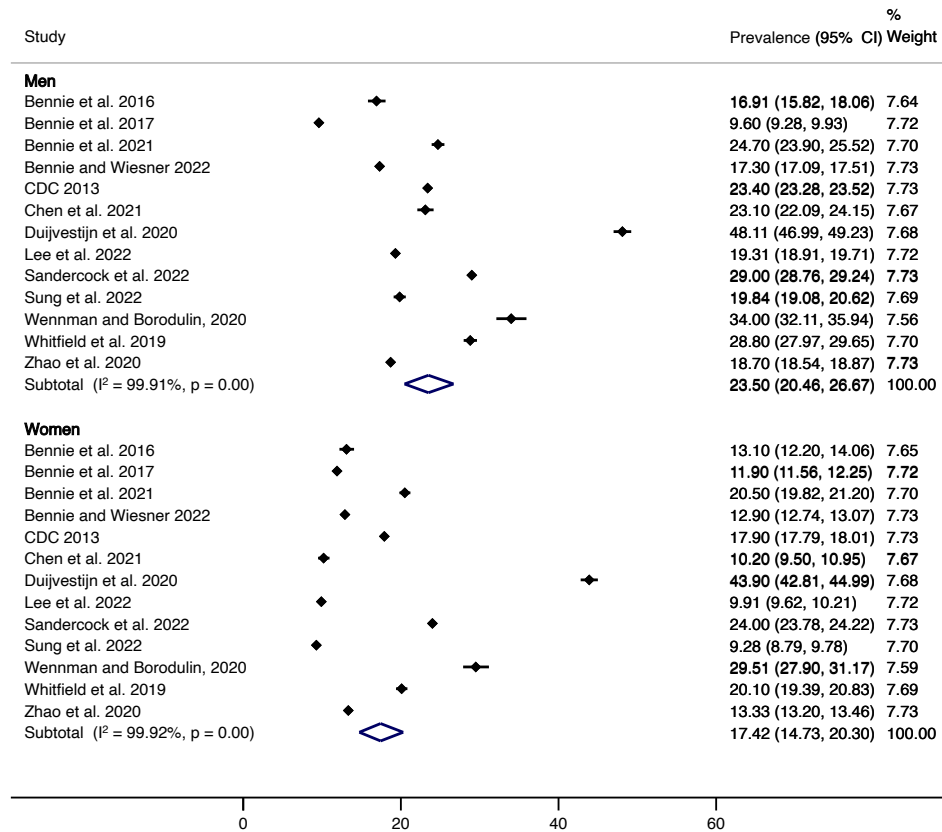

**Online supplemental eFigure 2.** Forest plot of adherence to aerobic and muscle-strengthening activities guidelines by age.

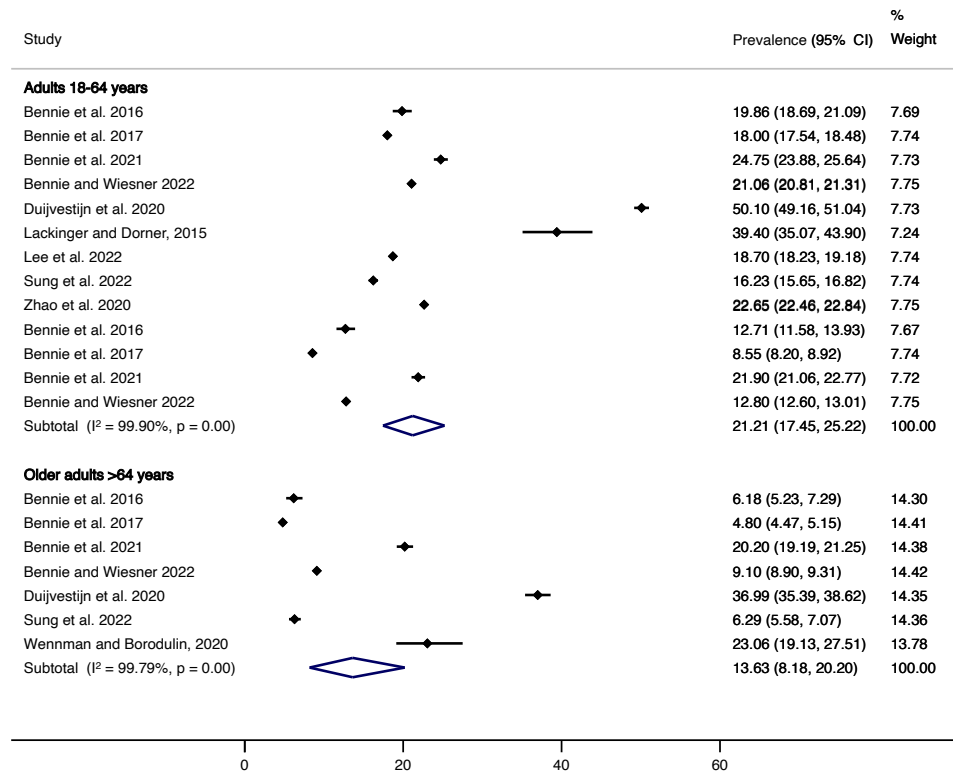

**Online supplemental eFigure 3.** Forest plot of adherence to aerobic and muscle-strengthening activities guidelines by weight status.

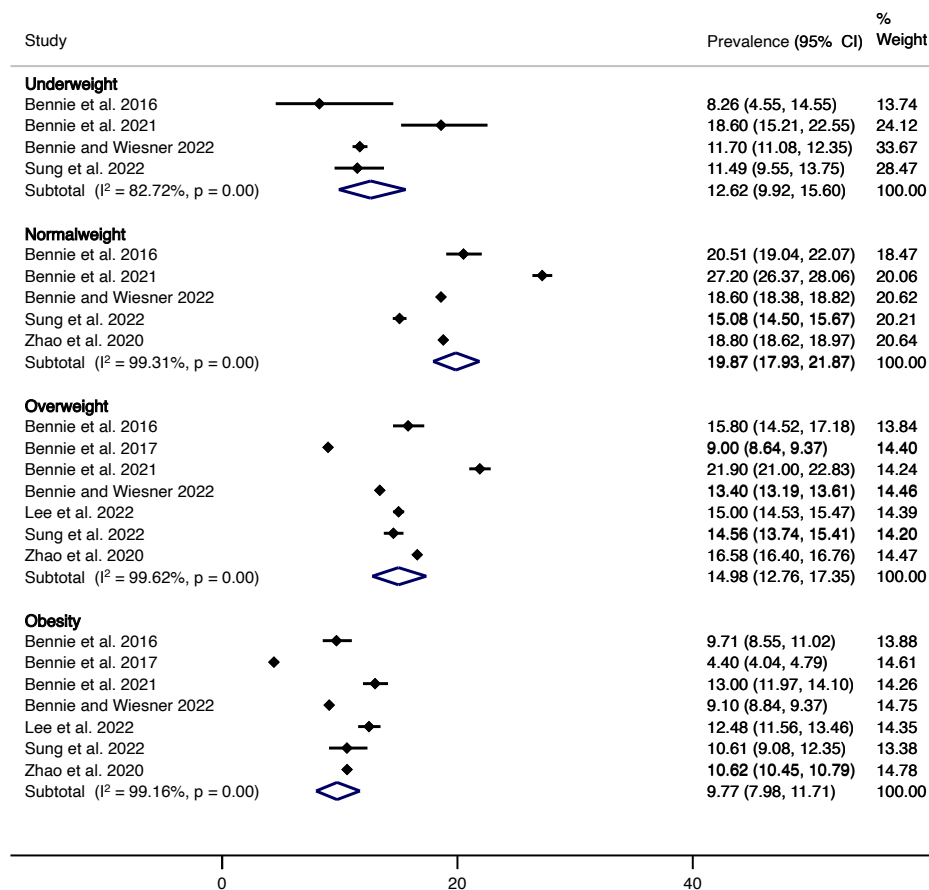

**Online supplemental eFigure 4.** Forest plot of adherence to aerobic and muscle-strengthening activities guidelines by education level.

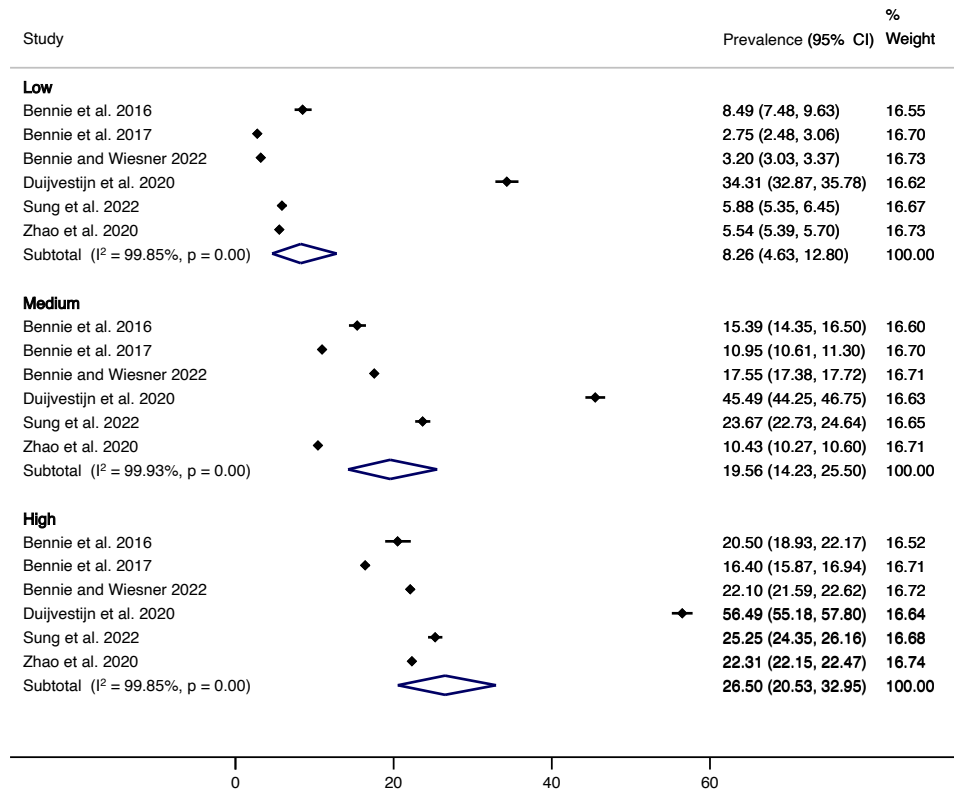

**Online supplemental eFigure 5.** Forest plot of adherence to aerobic and muscle-strengthening activities guidelines by smoking status.

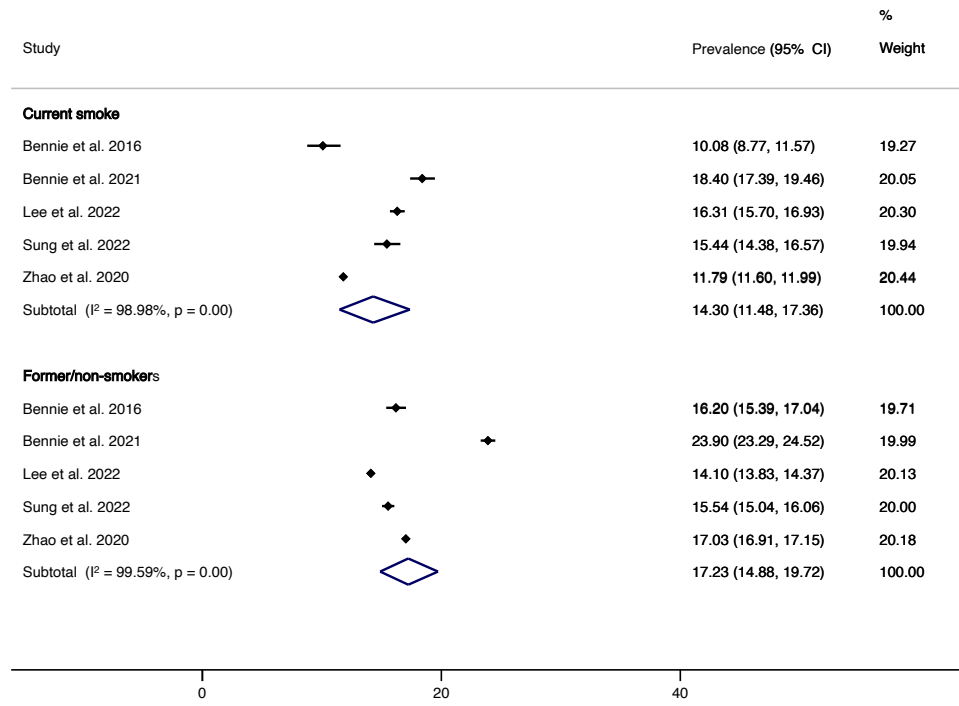

**Online supplemental eFigure 6.** Forest plot of adherence to aerobic and muscle-strengthening activities guidelines by self-rated health status.

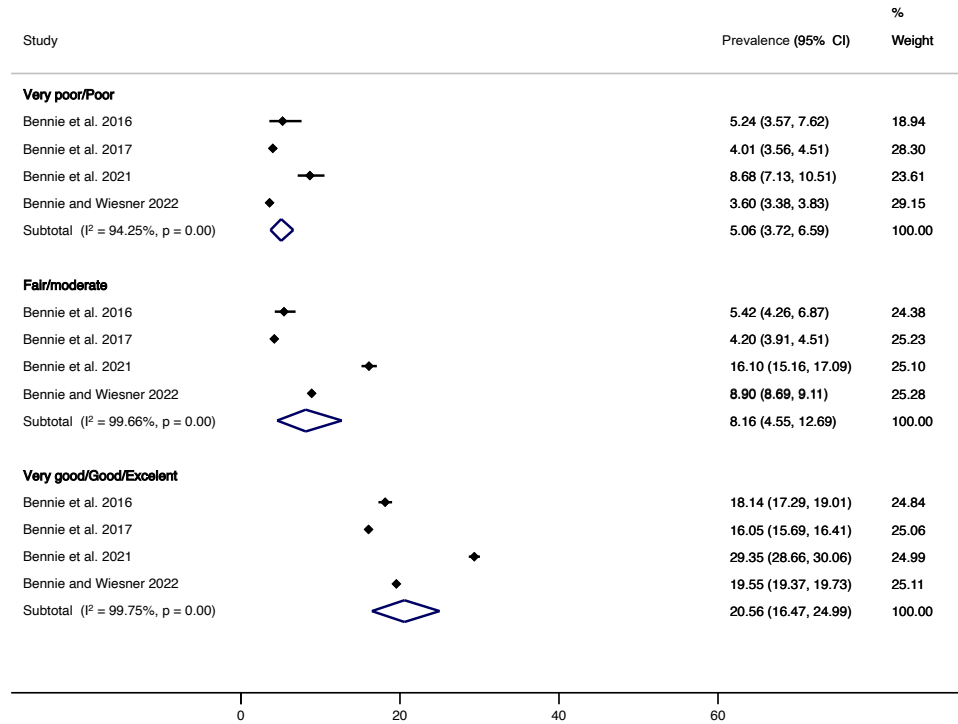

**Online supplemental eFigure 7.** Doi plot for adults  $\geq 18$  years old.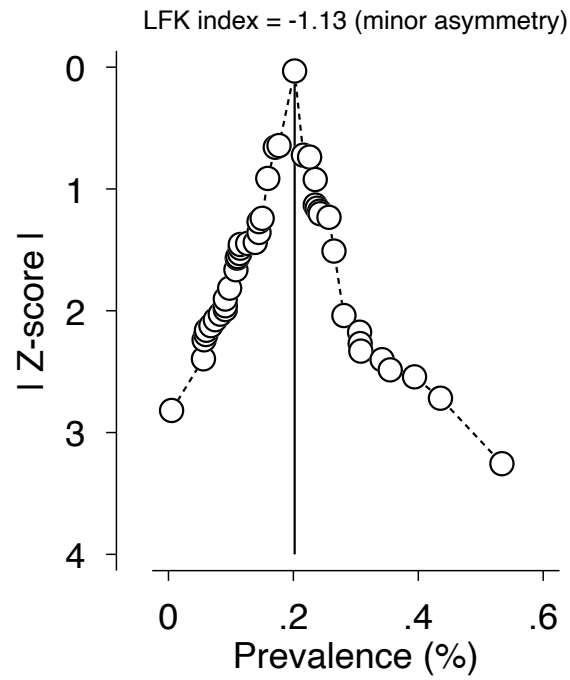

**Online supplemental eFigure 8.** Doi plot for adolescents aged 12-17 years old.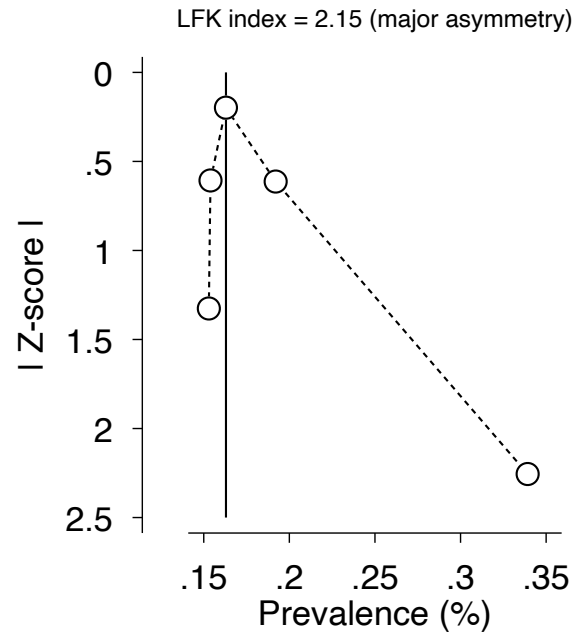

Supplement: inline-supplementary-material-1 [file inline-supplementary-material-1.pdf]
